# Supplementary material
Source: HighWire-hosted journal article supplement (https://bjo.bmj.com/content/102/2/276)
Supplement: inline-supplementary-material-1 [file inline-supplementary-material-1.pdf]

Supplementary table 1: Primers used for PCR amplification.

| Gene           | Region                                                  | Primer sequence (5'—3')                                          | Amplicon size (bp) | Annealing temp/time                                  |
|----------------|---------------------------------------------------------|------------------------------------------------------------------|--------------------|------------------------------------------------------|
| <i>NDP</i>     | Exon 1                                                  | 1F-GCGCCTCACATTTCCGTGGC<br>1R-TCCTAGGCAAGCCGGCAGC                | 352                | 58/30"                                               |
|                | Exon 2                                                  | 2F-GGAGGTGAAGCCATTCCAATT<br>2R-CTTGCCTGTTCTGAGGG                 | 499                | 58/30"                                               |
|                | Exon 3                                                  | 3.1F-CCTGGCTAAGTTGTGGC<br>3.1R-CACAGCAGCGGGCCTCAG                | 297                | 54/30"                                               |
|                | 3'UTR                                                   | 1F-5'-CCAGACTTCCAAGCTGAAGG-3'<br>1R-5'-ACCAAACACTGACAGCCTGA-3'   | 352                | 58 °C/30"                                            |
|                | 3'UTR                                                   | 2F-5'-TTGGCTCTCAATGCTGTTTG-3'<br>2R-5'-GCTGTCAAGAGTTCCAGCATC-3'  | 499                | 58 °C/30"                                            |
|                | 3'UTR                                                   | 3F-5'-CAGCCAGCGAACTGACATTA-3'<br>3R-5'-TTAGAGAATGATGCCCGTGA-3'   | 297                | 54 °C /30"                                           |
|                | 3'UTR                                                   | 4F-5'-GCATGCAAATTAGACAACCAA-3'<br>4R-5'-AGGAGATGCTCAAGCACTAGC-3' | 458                | 58 °C/30"                                            |
| <i>TSPAN12</i> | Exon 2                                                  | 2F-ATGTCCCGTGTCTCTCTCC<br>2R-CCAGGGGTGGATTTCTTTGT                | 382                | 58 °C/30"                                            |
|                | Exon 3                                                  | 3F-CAAGATGCAGCAAATGGTAA<br>3R-TCCAAAAGATCAAGGAAGAGC              | 306                | 47 °C /45"                                           |
|                | Exon 4                                                  | 4F-TGAGGCATCATGATTGAAAG<br>4R- CACTGCTCCCTAATCTTGTGA             | 341                | 58 °C /30"                                           |
|                | Exon 5                                                  | 5F-AGGGGCTTCATGAAAATTG<br>5R- GCGGAGTAAAATGAACTAACA              | 285                | 58 °C /30"                                           |
|                | Exon 6                                                  | 6F-GACATTCGAGTATGCGTGT<br>6R-GCAGGCCATGAAGTTACCTA                | 392                | 60 °C /25"                                           |
|                | Exon 7                                                  | 7F-TGTGTTTCTGAGGCTGACT<br>7R-TTCTTCTGCTTCTCCCCATA                | 330                | 55 °C /25"                                           |
|                | Exon8                                                   | 8.1F-GCTTTCCTGAGAACCACTG<br>8.1R- AAGCTGTTTGCCATGGATGT           | 420                | 60 °C /30"                                           |
|                |                                                         | 8.2F- GGGGACAGACCAAATGATGT<br>8.2RGTCCAGGTGGTGACTTATGA           | 341                | 58 °C /30"                                           |
|                |                                                         | P1F-CTTGTTTTACTGGACTTGTGAA<br>P1R-ATCAGAAGAATAGATCGCTGAG         | 428                | 50 °C /45"                                           |
|                | 3'UTR                                                   | P2F- TGGAGCCATAGTAAAGGTTGAT<br>P2R-TGTGTAATATAAGCCCAGGACA        | 419                | 55 °C /25"                                           |
|                |                                                         | P3F-ATTTGTCCTGTATAGCATCATT<br>P3R-TGATTCTCACAAGCATTTTTTC         | 430                | 50 °C /45"                                           |
|                |                                                         | P4F-GCTTATCTTTGCCTTCTCCAAA<br>P4R-GTGGCATAAGTGCTTGAATGT          | 365                | 55 °C /25"                                           |
|                |                                                         | <i>FZD4</i>                                                      | Exon 1             | 1F-GTGCAAACCTGGGGGTGTCTG<br>1R- GAGCTGTCTCCTTCGGGCTA |
| Exon 2/3'UTR   | 2.1F-TCAACTCAGCTTTGTGGGAGC<br>2.1R-GCGGCTGTATAAGCCAGCAT |                                                                  | 436                | 61 °C /23"                                           |
|                | 2.2F-CAGGTGATGAAGAGGTGCC<br>2.2R-TCCTTTCCCGGCTACAGTC    |                                                                  | 354                | 61 °C /23"                                           |
|                | 2.3F-GTTTTCTACCCTGAGCGCC<br>2.3R-CGGTGAGGGCATCGAGATTT   |                                                                  | 425                | 61 °C /23"                                           |
|                | 2.4F-CATCCCCGAGTGAAAACCA<br>2.4R-CATGCCTGAAGTGATGCCCA   |                                                                  | 421                | 61 °C /23"                                           |
|                | 2.5F-GCAACGTGTGTGATTGCCTG<br>2.5R-TTTTTGATGCTGGGGTCGGG  |                                                                  | 440                | 61 °C /23"                                           |

\*Previously described primers for 5'UTR and the coding regions of NDP genes<sup>24</sup> were used for the present study.
