# Supplementary material
Source: HighWire-hosted journal article supplement (https://bjo.bmj.com/content/102/2/276)
Supplement: inline-supplementary-material-2 [file inline-supplementary-material-2.pdf]

Supplementary table 2. Demographics of the study participants.

| <b>Study subjects</b>                    | <b>Cases</b>                                                                   | <b>Premature control</b> |
|------------------------------------------|--------------------------------------------------------------------------------|--------------------------|
| <b>Sample size</b>                       | 246                                                                            | 190                      |
| <b>Male</b>                              | 57.65%                                                                         | 52.88%                   |
| <b>Female</b>                            | 42.35%                                                                         | 47.12%                   |
| <b>Mean gestational age (weeks ± SD)</b> | 29.78±2.19                                                                     | 31.81±2.167              |
| <b>Mean birth weight (Kg± SD)</b>        | 1.26 ±0.27                                                                     | 1.44±0.369               |
| <b>Multiple birth</b>                    | 17%                                                                            | 19.40%                   |
| <b>Stages of ROP</b>                     | Stage1=4.3%, Stage2=17%, Stage3=25.7%, Stage4=22.7%, Stage5=27.9%, AP ROP=2.6% | Mature retina            |

#kg: Kilogram, SD: Standard deviation.
